# Supplementary material for: Wound-Healing Effects of Mesenchymal Stromal Cell Secretome in the Cornea and the Role of Exosomes
Source: MDPI journal article supplement (doi:10.3390/pharmaceutics15051486), 2023-05-13
Supplement: s1 [file s1]

Article

# Wound Healing Effects of Mesenchymal Stromal Cell Secretome in the Cornea and the Role Exosomes

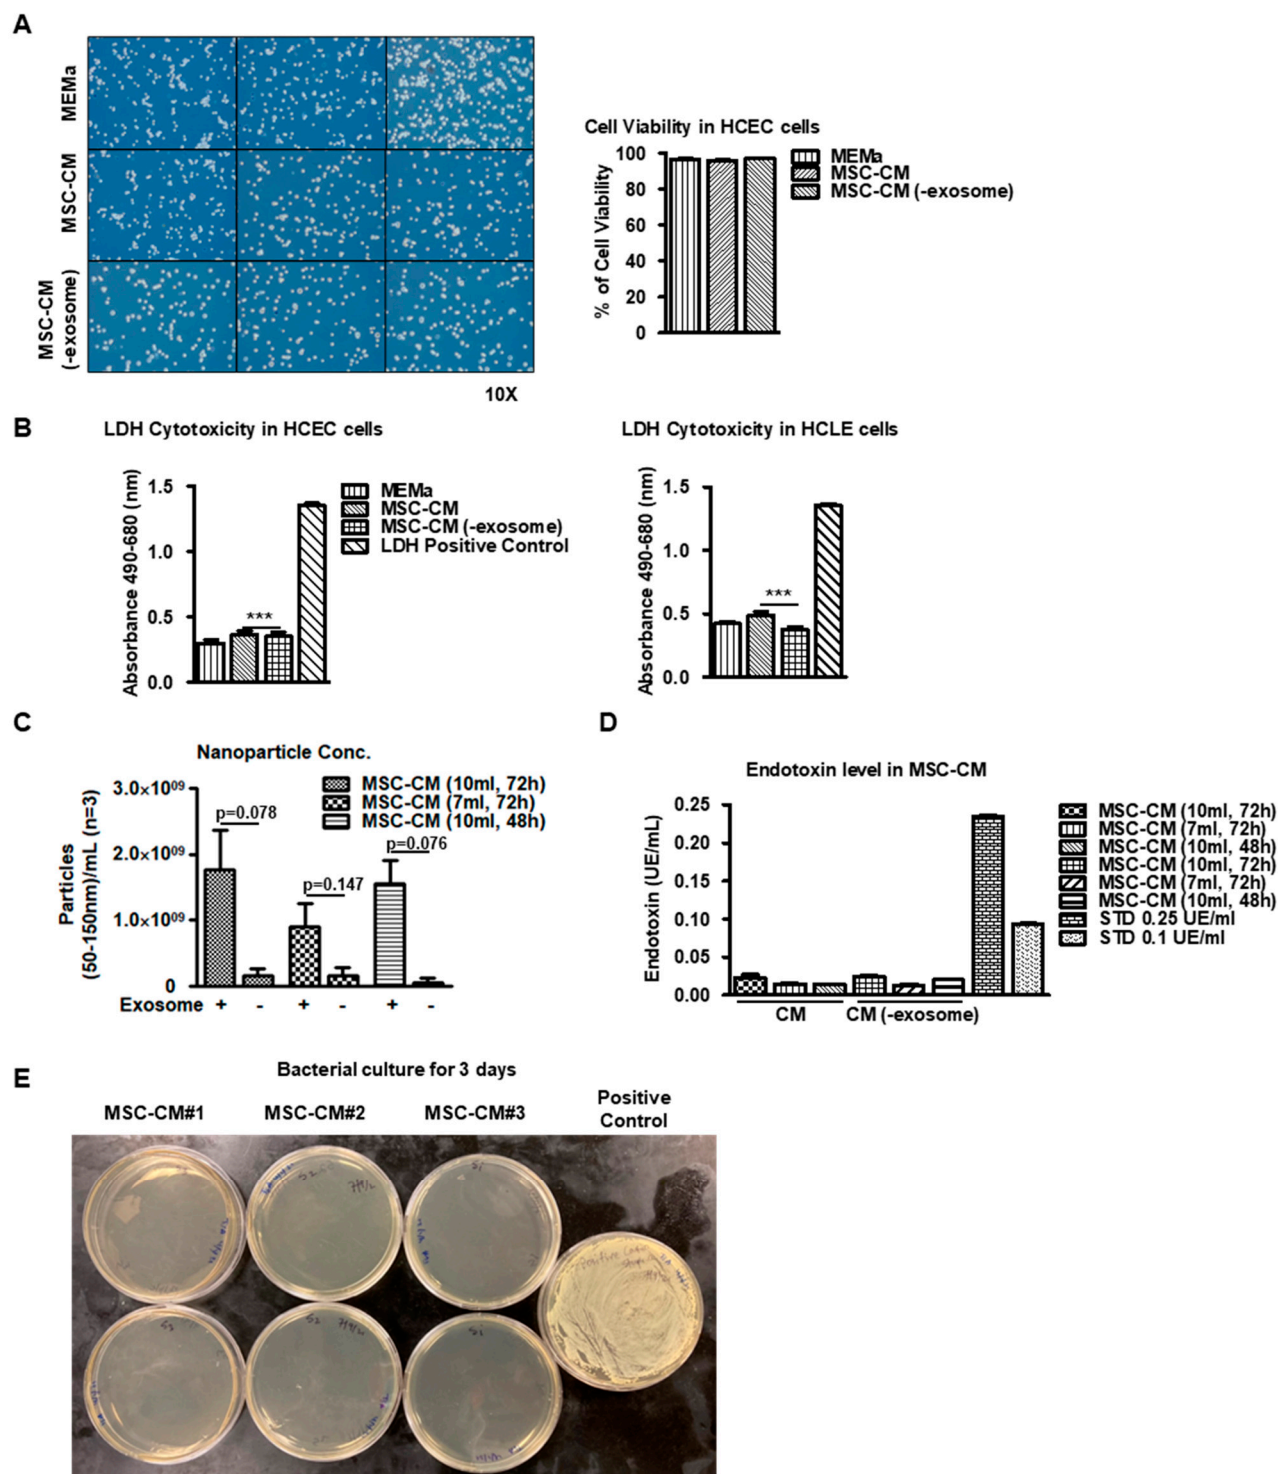

**Supplementary Figure S1.** Cell viability (Trypan blue staining), nanoparticles, endotoxin, and bacterial culture. (A) Cell viability was measured after incubation with a different medium for 24 h in HCEC cells (n=10/group). (B) Graph showing

cytotoxicity for various media in culture cells (HCEC and HCLE) as measured by LDH assay ( $n=6/\text{group}$ ). \*\*\*  $p < 0.001$  vs. STD groups (0.25 and 0.1 UE/ml). (C) Human MSC cells were incubated in different conditions to generate CM for 72 h. Nanoparticles were measured by NanoSight ( $n=3/\text{group}$ ). (MSC-CM 10ml, 72h:  $p=0.039$ , MSC-CM (7ml, 72h):  $p=0.147$ , MSC-CM (10ml, 48h):  $p=0.07$ ). -: exosome depleted MSC-CM. (D) Graph showing endotoxin levels in MSC-CM with or without exosome ( $n=3/\text{group}$ ). There was no difference in endotoxin levels between MSC-CM and exosome-depleted MSC-CM. (E) MSC-CM from different batches were used to check bacterial contamination ( $n=2/\text{group}$ ). MSC-CM was free of bacterial contamination.

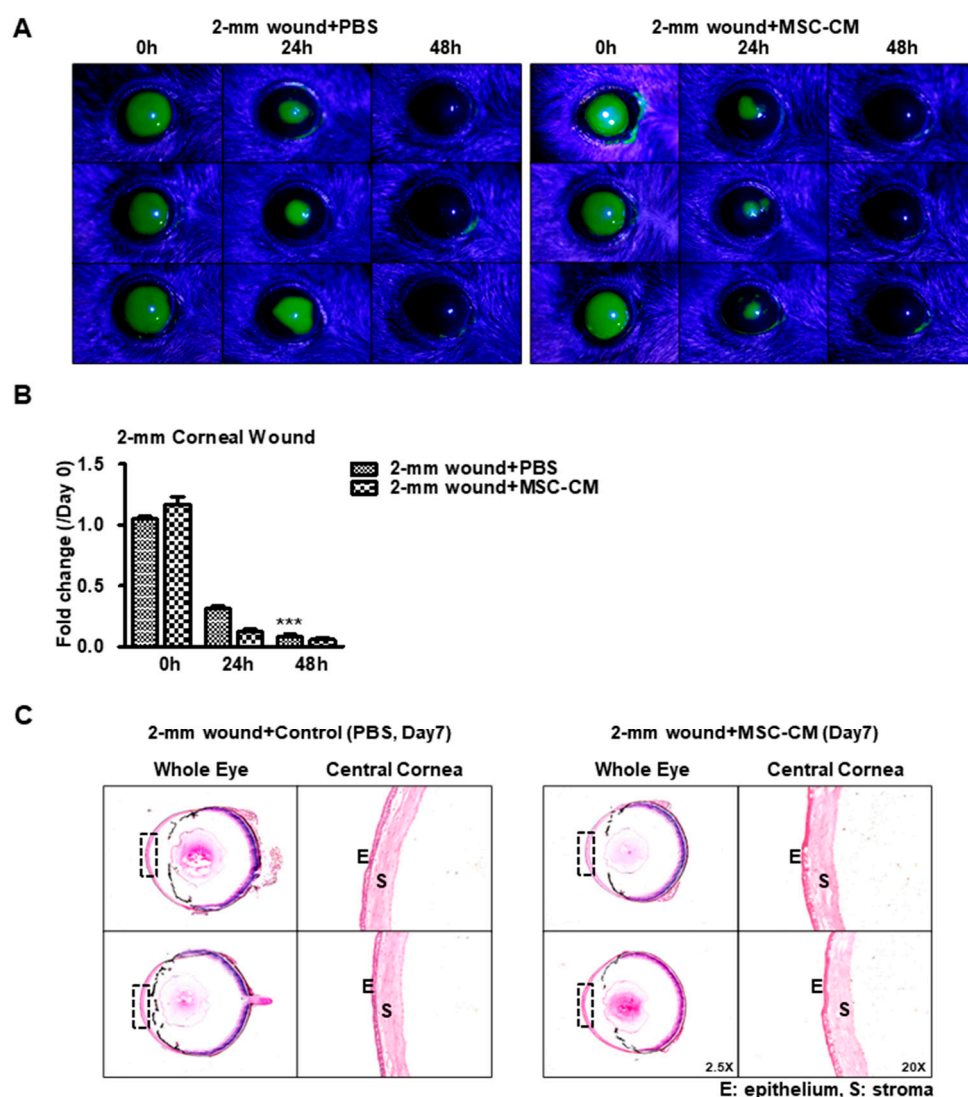

**Supplementary Figure S2.** Human MSC-CM helps corneal wound healing. (A) Representative images of murine corneas showing fluorescein staining after a 2-mm wound and application of PBS and MSC-CM for 48 h. (B) Graph showing the intensity of corneal fluorescein staining after application of PBS and MSC-CM for 48 h (PBS,  $n=6$ , MSC-CM,  $n=7$ ). \*\*\*  $p < 0.001$  vs. 2-mm+PBS. (C) H&E staining on whole eyeball after application of PBS and MSC-CM for 7 days. Black box: central cornea, E: epithelium, S: stroma. Black box: central cornea.

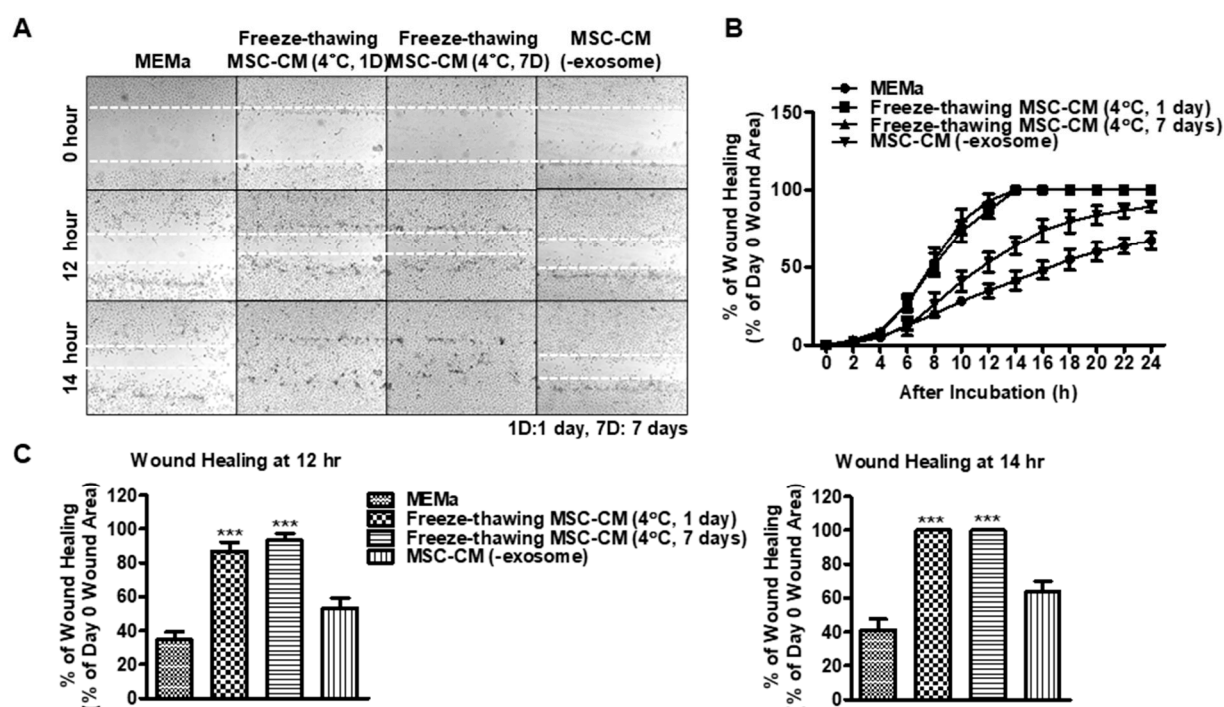

**Supplementary Figure S3.** Effects of pre-processing storage condition of MSC-CM on corneal wound healing in vitro scratch assay. (A) Representative images showing scratch wound assay in human corneal epithelial cells. White dot: wound area. (B) A kinetic curve showing the relative wound healing at different time points. (C) Graph showing wound healing rate for different conditions in epithelial scratch wounds ( $n = 5/\text{group}$ ) at 12 or 14 h. \*\*\*  $p < 0.001$  vs. MEMa or MSC-CM (-exosome).
